# Supplementary material for: Cost-Effectiveness of Chagas Disease Vector Control Strategies in Northwestern Argentina
Source: PLoS Negl Trop Dis. 2009 Jan 20;3(1):e363. doi: 10.1371/journal.pntd.0000363 (PMC2613538; doi:10.1371/journal.pntd.0000363)

**Figure S1.** Map of the distribution of villages and number of houses per village in Moreno Department, Province of Santiago del Estero, Argentina. Inset shows the location of Moreno in Argentina.

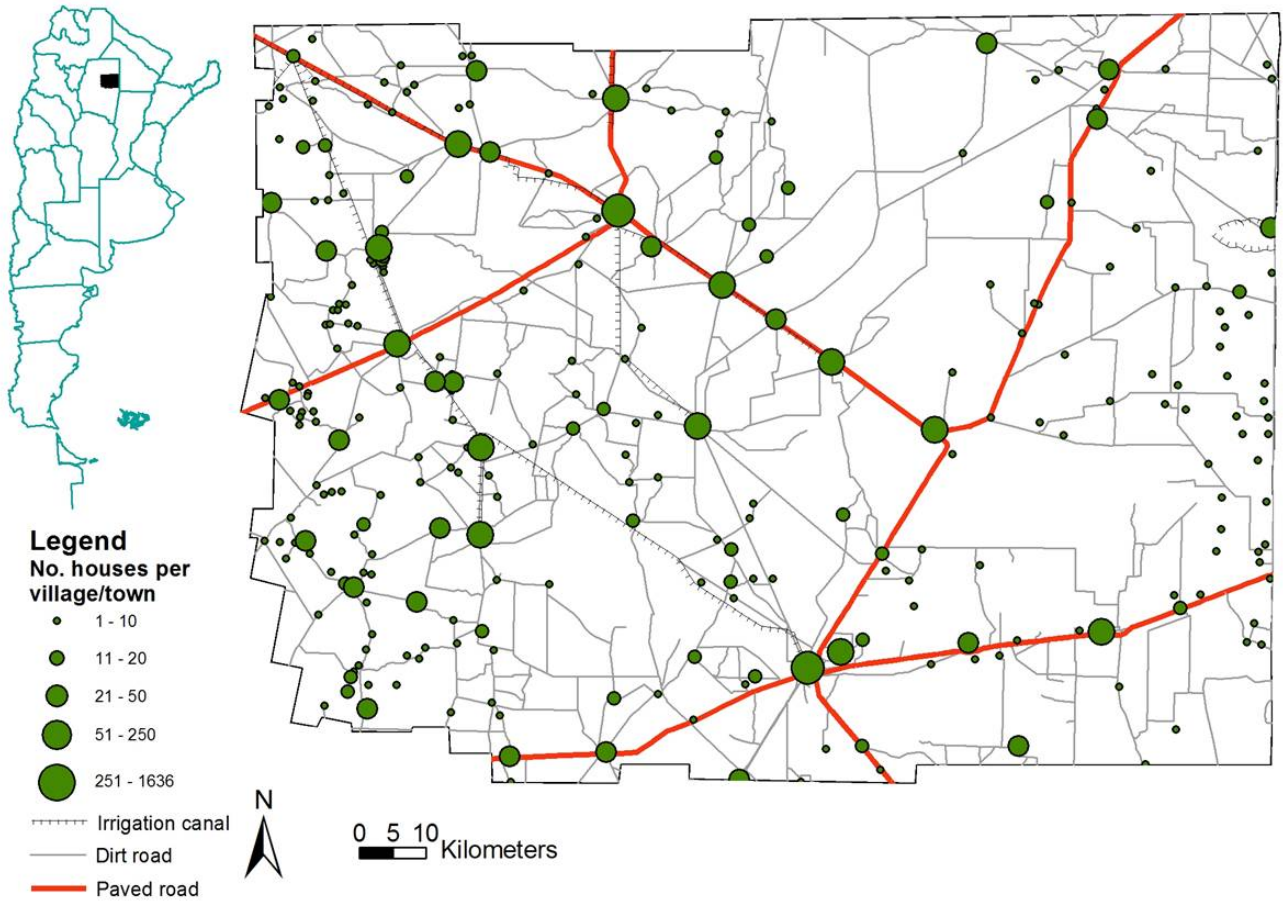

Supplement: Figure S1 — Map of the distribution of villages and number of houses per village in Moreno Department, Province of Santiago del Estero, Argentina (0.14 MB PDF) [file pntd.0000363.s001.pdf]
