# Supplementary material for: Cost-Effectiveness of Chagas Disease Vector Control Strategies in Northwestern Argentina
Source: PubMed Central journal article supplement (PMC2613538; doi:10.1371/journal.pntd.0000363), 2009-01-20
Supplement: pntd.0000363.s002.pdf [file pntd.0000363.s002.pdf]

**Table S1.** Total number of households sprayed, percentage of insecticide sprays performed by villagers and amount of insecticide and domestic biosensors delivered to the community leaders in the Moreno Department in 1993-2004.

| Control phase | Year            | No. houses sprayed (urban + rural) | Houses sprayed by villagers (%) | Insecticide type (doses <sup>1</sup> )                 |                                          |                                              |                                              |                                               | Total doses   | Fumigant canisters (units) | Domestic biosensors (units) |
|---------------|-----------------|------------------------------------|---------------------------------|--------------------------------------------------------|------------------------------------------|----------------------------------------------|----------------------------------------------|-----------------------------------------------|---------------|----------------------------|-----------------------------|
|               |                 |                                    |                                 | Delta-methrin (25 mg ai <sup>2</sup> /m <sup>2</sup> ) | Cipermethrin (125 mg ai/m <sup>2</sup> ) | Beta-cipermethrin (50 mg ai/m <sup>2</sup> ) | Alfa-cipermethrin (60 mg ai/m <sup>2</sup> ) | Lambda-cyhalothrin (33 mg ia/m <sup>2</sup> ) |               |                            |                             |
| Attack        | 1993            | 395                                | 100                             | 1,010                                                  | 0                                        | 0                                            | 0                                            | 0                                             | 1,010         | 60                         | 0                           |
|               | 1994            | 1,762                              | 83                              | 5,164                                                  | 1,841                                    | 0                                            | 0                                            | 3,103                                         | 10,108        | 411                        | 0                           |
|               | 1995            | 1,654                              | 59                              | 7,680                                                  | 2,801                                    | 0                                            | 0                                            | 800                                           | 11,281        | 251                        | 8,723                       |
|               | 1996            | 105                                | 100                             | 4,037                                                  | 325                                      | 326                                          | 0                                            | 814                                           | 5,502         | 0                          | 3,139                       |
|               | 1997            | 327                                | 100                             | 786                                                    | 98                                       | 214                                          | 0                                            | 521                                           | 1,619         | 10                         | 1,120                       |
|               | <b>Subtotal</b> | <b>4,243</b>                       | <b>77</b>                       | <b>18,677</b>                                          | <b>5,065</b>                             | <b>540</b>                                   | <b>0</b>                                     | <b>5,238</b>                                  | <b>29,520</b> | <b>732</b>                 | <b>12,982</b>               |
| Surveillance  | 1998            | 119                                | 71                              | 0                                                      | 0                                        | 26                                           | 291                                          | 365                                           | 682           | 0                          | 0                           |
|               | 1999            | 767                                | 96                              | 404                                                    | 0                                        | 2,509                                        | 432                                          | 1,719                                         | 5,064         | 1                          | 0                           |
|               | 2000            | 2,476                              | 94                              | 11,422                                                 | 0                                        | 873                                          | 1,751                                        | 698                                           | 14,744        | 0                          | 0                           |
|               | 2001            | 723                                | 86                              | 3,116                                                  | 0                                        | 824                                          | 154                                          | 65                                            | 4,159         | 503                        | 0                           |
|               | 2002            | 445                                | 74                              | 1,442                                                  | 0                                        | 0                                            | 878                                          | 0                                             | 2,320         | 453                        | 0                           |
|               | 2003            | 372                                | 80                              | 520                                                    | 0                                        | 0                                            | 733                                          | 0                                             | 1,253         | 94                         | 0                           |
|               | 2004            | 857                                | 32                              | 2,516                                                  | 0                                        | 0                                            | 0                                            | 0                                             | 2,516         | 10                         | 0                           |
|               | <b>Subtotal</b> | <b>5,759</b>                       | <b>76</b>                       | <b>19,420</b>                                          | <b>0</b>                                 | <b>4,232</b>                                 | <b>4,239</b>                                 | <b>2,847</b>                                  | <b>30,738</b> | <b>1,061</b>               | <b>0</b>                    |
| Total         |                 | 10,002                             | 79                              | 38,097                                                 | 5,065                                    | 4,772                                        | 4,239                                        | 8,085                                         | 60,258        | 1,793                      | 12,982                      |

<sup>1</sup>Dosis, bottles with the amount of insecticide necessary for charging a 5 L manual compression sprayer. The amounts of insecticide per dosis are: 100 ml for deltamethrin (Agrevo), betacipermethrin (Chemotecnica), alfacipermethrin (BASF), and cypermethrin (Chemotecnica); 3.75 gr for lambdacyhalothrin (Zeneca).

<sup>2</sup>ai, active ingredient.
