# Supplementary material for: Cost-Effectiveness of Chagas Disease Vector Control Strategies in Northwestern Argentina
Source: PubMed Central journal article supplement (PMC2613538; doi:10.1371/journal.pntd.0000363), 2009-01-20
Supplement: pntd.0000363.s005.pdf [file pntd.0000363.s005.pdf]

**Table S4.** Estimated cost (in 2004 US\$) of each one of the direct and indirect components related to the implementation of a *T. infestans* mixed (i.e., vertical attack phase followed by horizontal surveillance) strategy in the Moreno Department during 1993-2004.

| Cost          | Category        | Expenses                           | Attack<br>(1993-1997) | Surveillance<br>(1998-2004) | Total<br>(1993-2004) |
|---------------|-----------------|------------------------------------|-----------------------|-----------------------------|----------------------|
| Direct        | Consumables     | Insecticide <sup>1</sup>           | 41,305                | 40,630                      | 81,935               |
|               |                 | Spraying machines                  | 593                   | 6,478                       | 7,071                |
|               |                 | Biosensors                         | 0                     | 17,466                      | 17,466               |
|               | Personnel       | Protection <sup>2</sup>            | 2,752                 | 1,684                       | 4,436                |
|               |                 | Wages <sup>3</sup>                 | 59,701                | 17,021                      | 76,722               |
|               | Mobility        | Per diem <sup>3</sup>              | 113,975               | 32,266                      | 146,241              |
|               |                 | Gasoline                           | 2,660                 | 2,341                       | 5,001                |
| Vehicle fixes |                 | 266                                | 234                   | 500                         |                      |
|               | <i>Subtotal</i> |                                    | <i>221,252</i>        | <i>118,121</i>              | <i>339,373</i>       |
| Indirect      | Personnel       | Personnel maintenance <sup>4</sup> | 130,439               | 97,724                      | 228,163              |
|               | Mobility        | Vehicle maintenance <sup>5</sup>   | 4,118                 | 11,232                      | 15,350               |
|               | <i>Subtotal</i> |                                    | <i>134,557</i>        | <i>108,956</i>              | <i>243,513</i>       |
| <b>Total</b>  |                 |                                    | <b>355,808</b>        | <b>227,077</b>              | <b>582,885</b>       |

<sup>1</sup> Considering 2 spraying cycles of the 2,911 rural houses of the department in the attack phase, and the supply of insecticides to community leaders in the surveillance phase.

<sup>2</sup> Personal protection elements: work clothes, masks, globes, helmet, and goggles.

<sup>3</sup> Assuming the activity of 3 groups of 3 NCS technicians working for 35 (attack) or 56 (surveillance) trips per year, each lasting for 17 days.

<sup>4</sup> Represents the cost (in wages) of maintaining the personnel during the time it is not in the field.

<sup>5</sup> Represents the cost in parts, mechanical services and general fixes of the vehicles while not in the field.
