# Supplementary material for: Cost-Effectiveness of Chagas Disease Vector Control Strategies in Northwestern Argentina
Source: PLoS Negl Trop Dis. 2009 Jan 20;3(1):e363. doi: 10.1371/journal.pntd.0000363 (PMC2613538; doi:10.1371/journal.pntd.0000363)
Supplement: Table S2 — Observed cost (in 2004 US$) of each one of the direct and indirect components related to the implementation of the T. infestans fully horizontal control strategy implemented in Moreno Department during 1993–2004 (0.03 MB PDF) [file pntd.0000363.s003.pdf]

**Table S2.** Observed cost (in 2004 US\$) of each one of the direct and indirect components related to the implementation of the *T. infestans* fully horizontal control strategy implemented in Moreno Department during 1993-2004.

|          |             |                                    | Attack        | Surveillance   | Total          |
|----------|-------------|------------------------------------|---------------|----------------|----------------|
| Cost     | Category    | Expenses                           | (1993-1997)   | (1998-2004)    | (1993-2004)    |
| Direct   | Consumables | Insecticide                        | 21,358        | 40,630         | 61,989         |
|          |             | Spraying machines                  | 6,478         | 6,478          | 12,956         |
|          |             | Biosensors                         | 13,596        | 0              | 13,596         |
|          |             | Protection <sup>1</sup>            | 1,684         | 1,684          | 3,369          |
|          | Personnel   | Wages                              | 6,983         | 17,021         | 24,004         |
|          |             | Per diem                           | 13,239        | 32,266         | 45,505         |
|          | Mobility    | Gasoline                           | 1,006         | 2,341          | 3,347          |
|          |             | Vehicle fixes                      | 101           | 234            | 335            |
|          |             | <i>Subtotal</i>                    |               | <i>64,446</i>  | <i>100,655</i> |
| Indirect | Personnel   | Personnel maintenance <sup>2</sup> | 33,997        | 97,724         | 131,721        |
|          | Mobility    | Vehicle maintenance <sup>3</sup>   | 1,372         | 11,232         | 12,605         |
|          |             | <i>Subtotal</i>                    | <i>35,369</i> | <i>108,956</i> | <i>144,326</i> |
|          |             | <b>Total</b>                       | <b>99,815</b> | <b>209,612</b> | <b>309,427</b> |

<sup>1</sup> Personal protection elements: masks, globes, helmet, goggles.

<sup>2</sup> Represents the cost (in wages) of maintaining the personnel during the time it is not in the field.

<sup>3</sup> Represents the cost in parts, mechanical services and general fixes of the vehicles while not in the field.
