# Supplementary material for: Cost-Effectiveness of Chagas Disease Vector Control Strategies in Northwestern Argentina
Source: PLoS Negl Trop Dis. 2009 Jan 20;3(1):e363. doi: 10.1371/journal.pntd.0000363 (PMC2613538; doi:10.1371/journal.pntd.0000363)
Supplement: Table S3 — Estimated cost (in 2004 US$) of each one of the direct and indirect components related to the implementation of a T. infestans vertical control strategy in Moreno Department during 1993–2004 (0.03 MB PDF) [file pntd.0000363.s004.pdf]

**Table S3.** Estimated cost (in 2004 US\$) of each one of the direct and indirect components related to the implementation of a *T. infestans* vertical control strategy in Moreno Department during 1993-2004.

| Cost     | Category    | Expenses                           | Attack<br>(1993-1997) | Surveillance<br>(1998-2004) | Total<br>(1993-2004) |
|----------|-------------|------------------------------------|-----------------------|-----------------------------|----------------------|
| Direct   | Consumables | Insecticide <sup>1</sup>           | 41,305                | 37,542 <sup>2</sup>         | 78,846               |
|          |             | Spraying machines                  | 593                   | 593                         | 1,186                |
|          |             | Biosensors                         | 0                     | 0                           | 0                    |
|          | Personnel   | Protection <sup>3</sup>            | 2,752                 | 3,852                       | 6,604                |
|          |             | Wages <sup>4</sup>                 | 59,701                | 95,522                      | 155,223              |
|          |             | Per diem <sup>4</sup>              | 113,975               | 182,359                     | 296,334              |
|          | Mobility    | Gasoline                           | 2,660                 | 4,257                       | 6,917                |
|          |             | Vehicle fixes                      | 266                   | 426                         | 692                  |
|          |             | <i>Subtotal</i>                    | <i>221,252</i>        | <i>324,550</i>              | <i>545,802</i>       |
| Indirect | Personnel   | Personnel maintenance <sup>5</sup> | 130,439               | 160,842                     | 291,281              |
|          | Mobility    | Vehicle maintenance <sup>6</sup>   | 4,118                 | 8,425                       | 12,543               |
|          |             | <i>Subtotal</i>                    | <i>134,557</i>        | <i>169,267</i>              | <i>303,823</i>       |
|          |             | <b>Total</b>                       | <b>355,808</b>        | <b>493,817</b>              | <b>849,625</b>       |

<sup>1</sup> Considering 2 spraying cycles of the 2,911 rural houses of the department in the attack phase, and of 10% of the houses in the surveillance phase.

<sup>2</sup> Estimated from the cost of tetramethrin for timed-manual collections and the cost of deltamethrin for the spraying of infested households.

<sup>3</sup> Personal protection elements: work clothes, masks, globes, helmet, and goggles.

<sup>4</sup> Assuming the activity of 3 groups of 3 NCS technicians working for 35 (attack) or 56 (surveillance) trips per year, each lasting for 17 days.

<sup>5</sup> Represents the cost (in wages) of maintaining the personnel during the time they are not in the field.

<sup>6</sup> Represents the cost in parts, mechanical services and general fixes of the vehicles while not in the field.
